# Supplementary material for: Deviations in RSV epidemiological patterns and population structures in the United States following the COVID-19 pandemic
Source: PubMed Central journal article supplement (PMC11032338; doi:10.1038/s41467-024-47757-9), 2024-04-20
Supplement: 41467_2024_47757_MOESM1_ESM.pdf [file 41467_2024_47757_MOESM1_ESM.pdf]

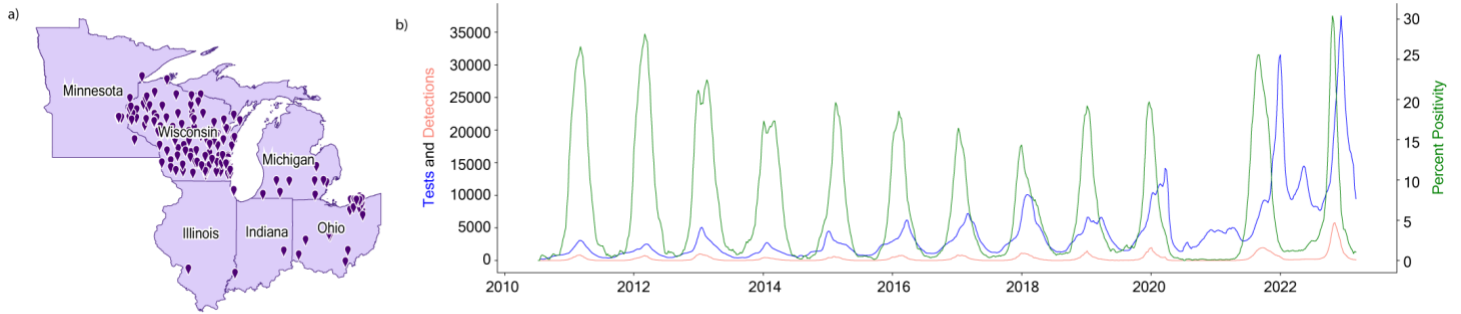

1  
2 **Supplementary Figure 1 | Epidemiology of RSV in the Upper Midwest of the United States.** a, Locations of  
3 participating laboratories in the Department of Health and Human Services (HHS) Region 5 (Illinois, Indiana,  
4 Michigan, Minnesota, Ohio, and Wisconsin) that provide RSV testing data to the National Respiratory and Enteric  
5 Virus Surveillance System (NREVSS). b, Epidemiology of RSV in HHS Region 5 as represented by a 3-week  
6 rolling average of tests (blue), detections (pink), and percent positivity (green) between July 10<sup>th</sup>, 2010, and June  
7 3<sup>rd</sup>, 2023 per data provided to the NREVSS.

8

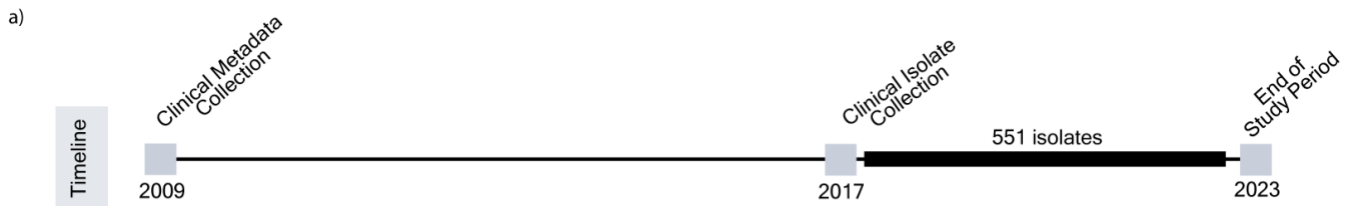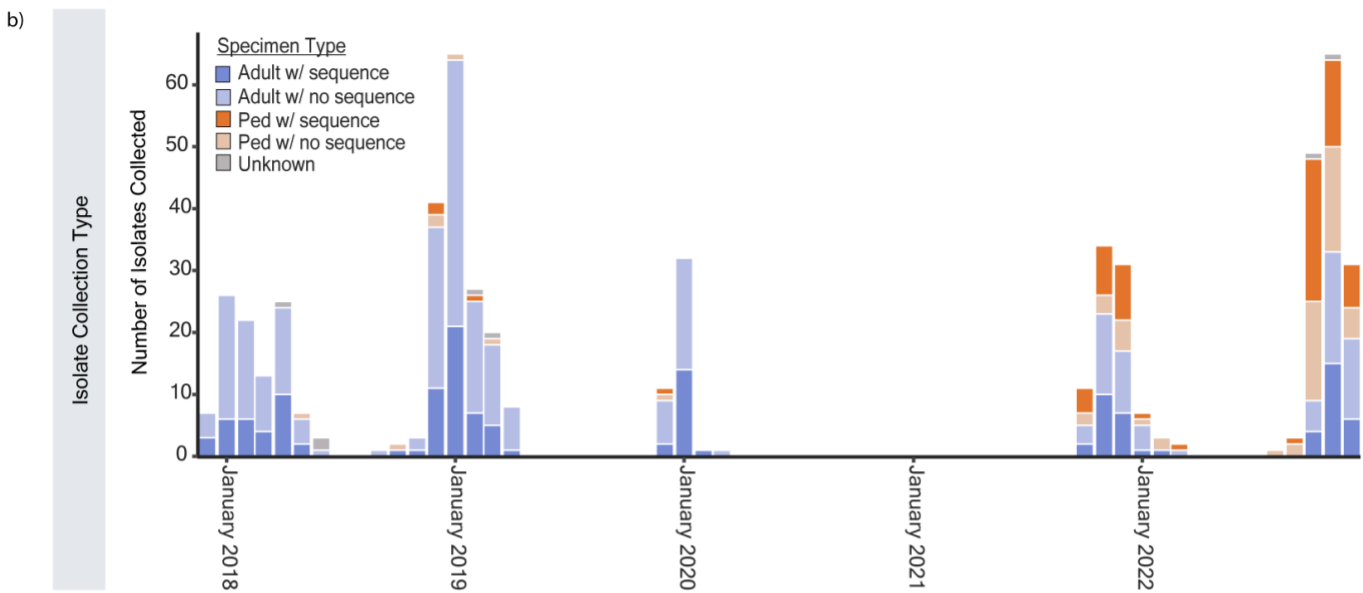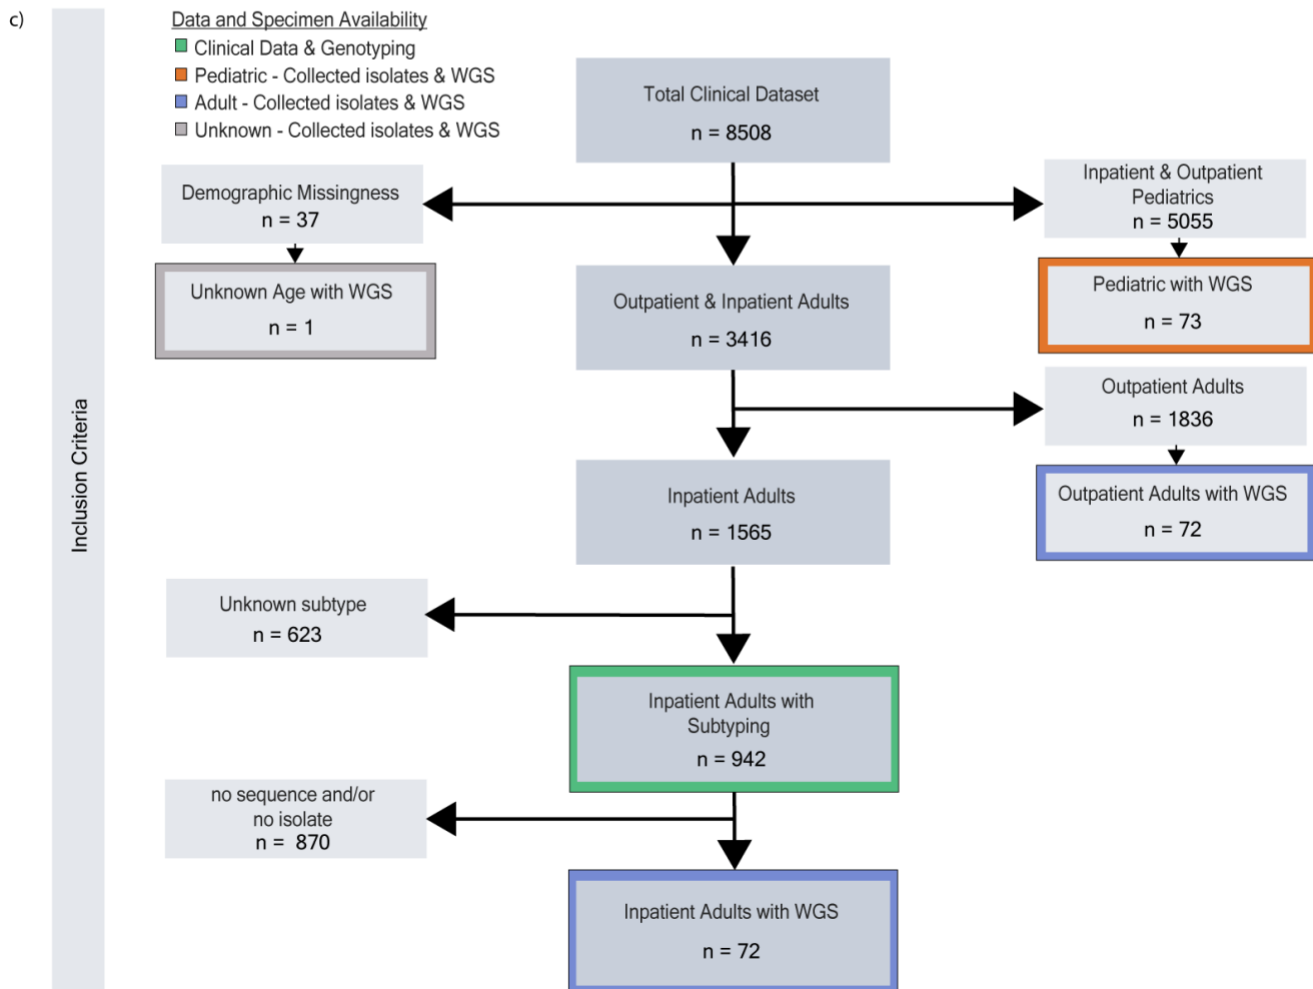

Supplementary Figure 2 | Timeline and Inclusion Criteria of RSV Clinical Metadata and Isolate Collection.

a, Timeline of the study, including clinical metadata and isolate collection. b, Absolute counts of isolates collected

12 over the study period by month. Isolates are categorized by whether they are isolated from adult patients with  
13 (dark purple) or without (light purple) sequence information, as well as from pediatric patients with (dark orange)  
14 or without (light orange) sequence information. Samples from patients without age information are categorized  
15 as unknown (gray). **c**, Inclusion and exclusion criteria of patient metadata and isolates. Patient subsets used for  
16 logistic regression modeling (green) or whole genome sequencing (dark purple, orange, and gray) are  
17 highlighted.

18

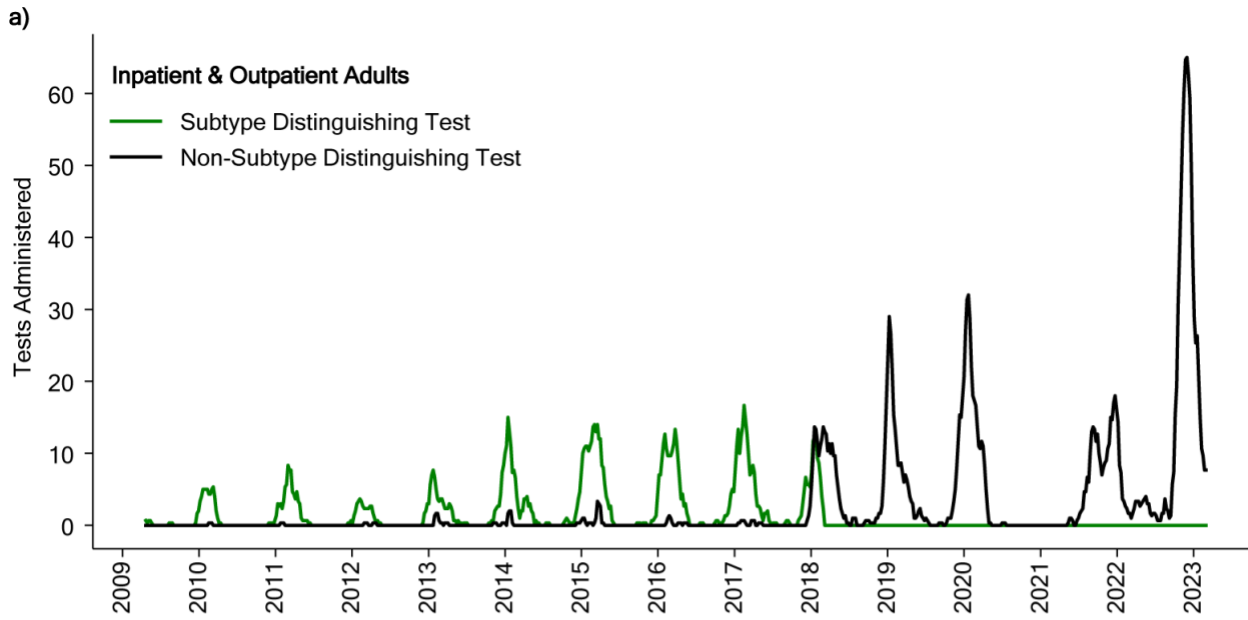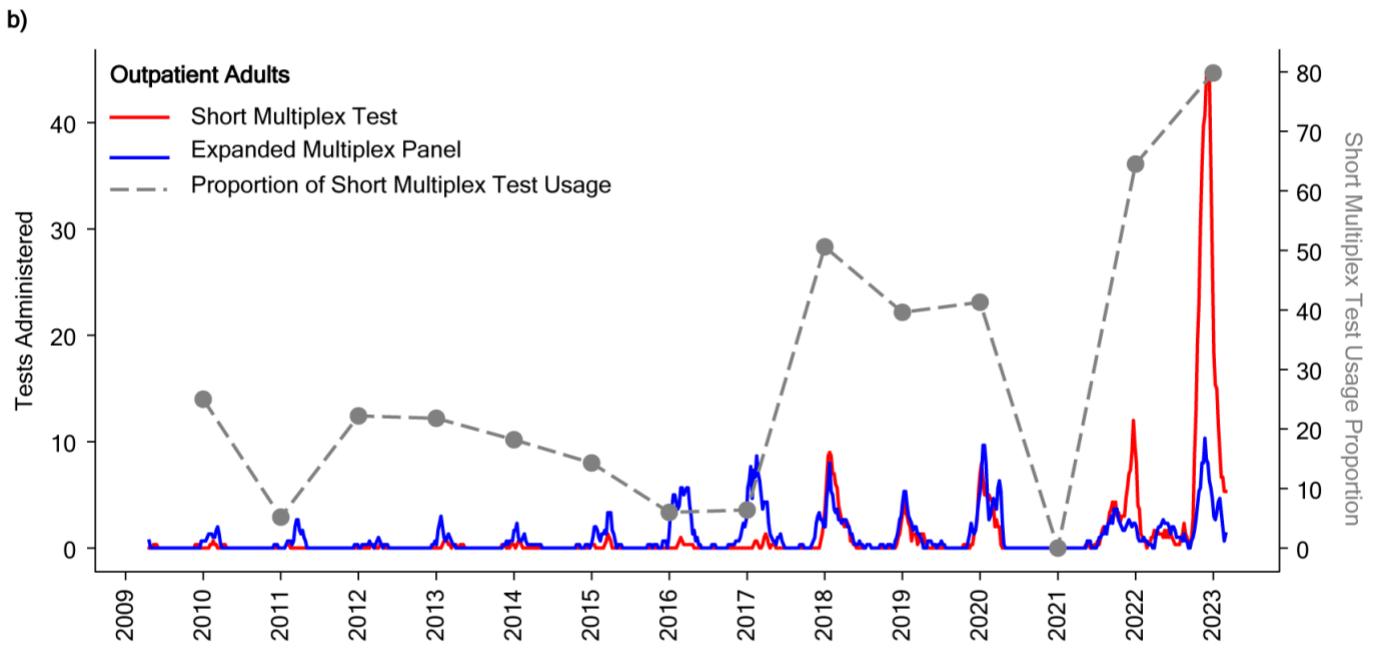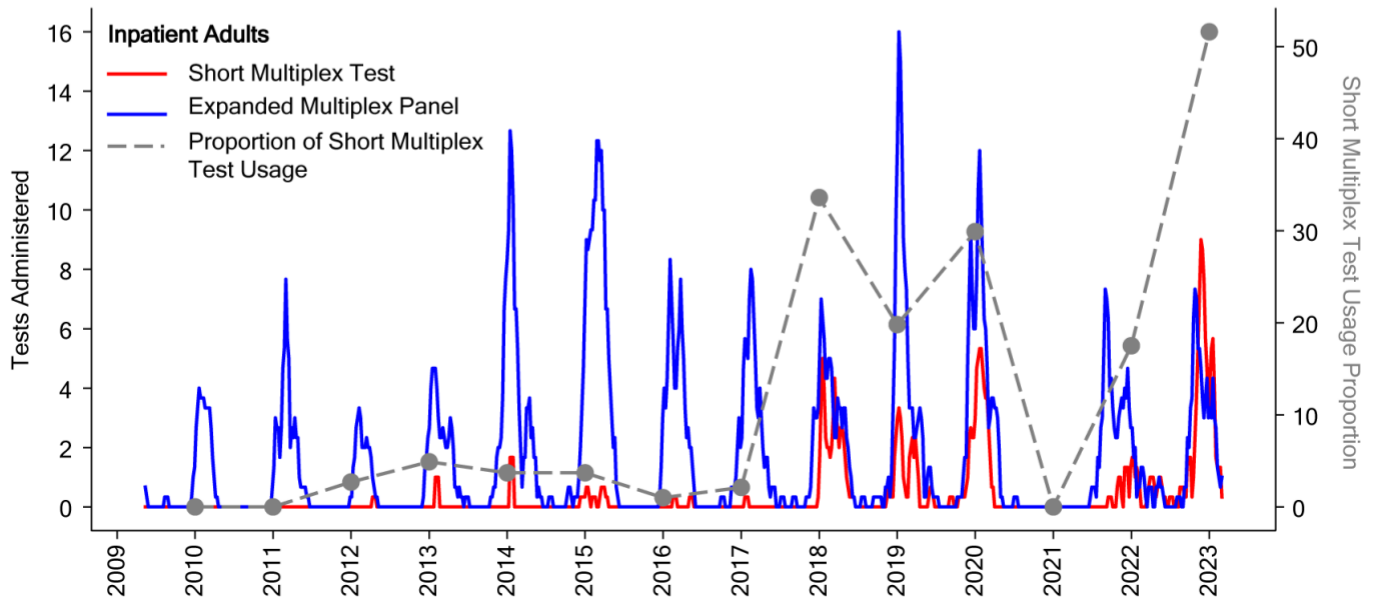

20 **Supplementary Figure 3 | Shifts in Diagnostic Platform Use among Adult Inpatient and Outpatient**  
21 **Encounters from 2010 to 2023.** **a**, Distribution of RSV subtype-distinguishing diagnostic tests over time as  
22 represented by a 3-week rolling average of tests that provide (green, n = 1108) or don't provide (black, n = 2047)  
23 subtyping information. **b**, 3-week rolling average of short (red) and expanded, multiplex panel (blue) tests  
24 administered among outpatient adults (top, n = 1644) and inpatient adults (bottom, n = 1567). Encounters with  
25 unknown diagnostic types and testing categories representative of less than 1% of the dataset (n = 205) were  
26 excluded. The proportion of short multiplex diagnostic use (*i.e.*, PCR Test for Influenza and RSV, or Triplex PCR  
27 Test for Influenza, RSV, and SARS-CoV-2) for each season is also shown (gray). All reported encounters  
28 occurred between April 8<sup>th</sup>, 2009 to March 1<sup>st</sup>, 2023.

29

a)

| RSV-A vs. RSV-B Infection<br>full model |                 |                     |              |
|-----------------------------------------|-----------------|---------------------|--------------|
| Characteristic                          | OR <sup>†</sup> | 95% CI <sup>†</sup> | p-value      |
| Sex                                     |                 |                     |              |
| Female                                  | —               | —                   |              |
| Male                                    | 1.23            | 0.94, 1.61          | 0.13         |
| Race                                    |                 |                     |              |
| White                                   | —               | —                   |              |
| Asian                                   | 0.68            | 0.30, 1.52          | 0.3          |
| Black or African American               | 1.18            | 0.87, 1.62          | 0.3          |
| Declined or Unable to Respond           | 0.88            | 0.40, 1.96          | 0.8          |
| Other                                   | 0.90            | 0.56, 1.43          | 0.6          |
| Ethnicity                               |                 |                     |              |
| Not Hispanic or Latino                  | —               | —                   |              |
| Declined or Unable to Respond           | 0.86            | 0.39, 1.90          | 0.7          |
| Hispanic or Latino                      | 0.94            | 0.58, 1.53          | 0.8          |
| BMI                                     | 0.99            | 0.98, 1.01          | 0.3          |
| Age at Admission                        | 1.01            | 1.00, 1.01          | 0.11         |
| Comorbidity Sum                         | 0.92            | 0.85, 0.99          | <b>0.025</b> |
| ICU Admission                           | 0.68            | 0.49, 0.94          | <b>0.018</b> |
| RSV associated death                    | 1.33            | 0.73, 2.45          | 0.4          |
| Month of Patient Admission              | 1.00            | 1.00, 1.00          | 0.11         |
| Hospitalization Length of Stay          | 1.01            | 0.99, 1.02          | 0.5          |

<sup>†</sup> OR = Odds Ratio, CI = Confidence Interval

b)

| RSV-A vs. RSV-B Infection<br>full model pre-pandemic |                 |                     |              |
|------------------------------------------------------|-----------------|---------------------|--------------|
| Characteristic                                       | OR <sup>†</sup> | 95% CI <sup>†</sup> | p-value      |
| Sex                                                  |                 |                     |              |
| Female                                               | —               | —                   |              |
| Male                                                 | 1.25            | 0.95, 1.64          | 0.11         |
| Race                                                 |                 |                     |              |
| White                                                | —               | —                   |              |
| Asian                                                | 0.68            | 0.30, 1.53          | 0.4          |
| Black or African American                            | 1.16            | 0.85, 1.58          | 0.4          |
| Declined or Unable to Respond                        | 0.92            | 0.42, 2.06          | 0.8          |
| Other                                                | 0.91            | 0.57, 1.46          | 0.7          |
| Ethnicity                                            |                 |                     |              |
| Not Hispanic or Latino                               | —               | —                   |              |
| Declined or Unable to Respond                        | 0.89            | 0.40, 1.98          | 0.8          |
| Hispanic or Latino                                   | 0.97            | 0.60, 1.58          | >0.9         |
| BMI                                                  | 0.99            | 0.98, 1.01          | 0.3          |
| Age at Admission                                     | 1.01            | 1.00, 1.01          | 0.093        |
| Comorbidity Sum                                      | 0.92            | 0.86, 1.00          | <b>0.040</b> |
| ICU Admission                                        | 0.68            | 0.49, 0.95          | <b>0.022</b> |
| RSV associated death                                 | 1.32            | 0.72, 2.44          | 0.4          |
| Month of Patient Admission                           | 1.00            | 1.00, 1.00          | 0.2          |
| Hospitalization Length of Stay                       | 1.00            | 0.99, 1.02          | 0.6          |

<sup>†</sup> OR = Odds Ratio, CI = Confidence Interval

c)

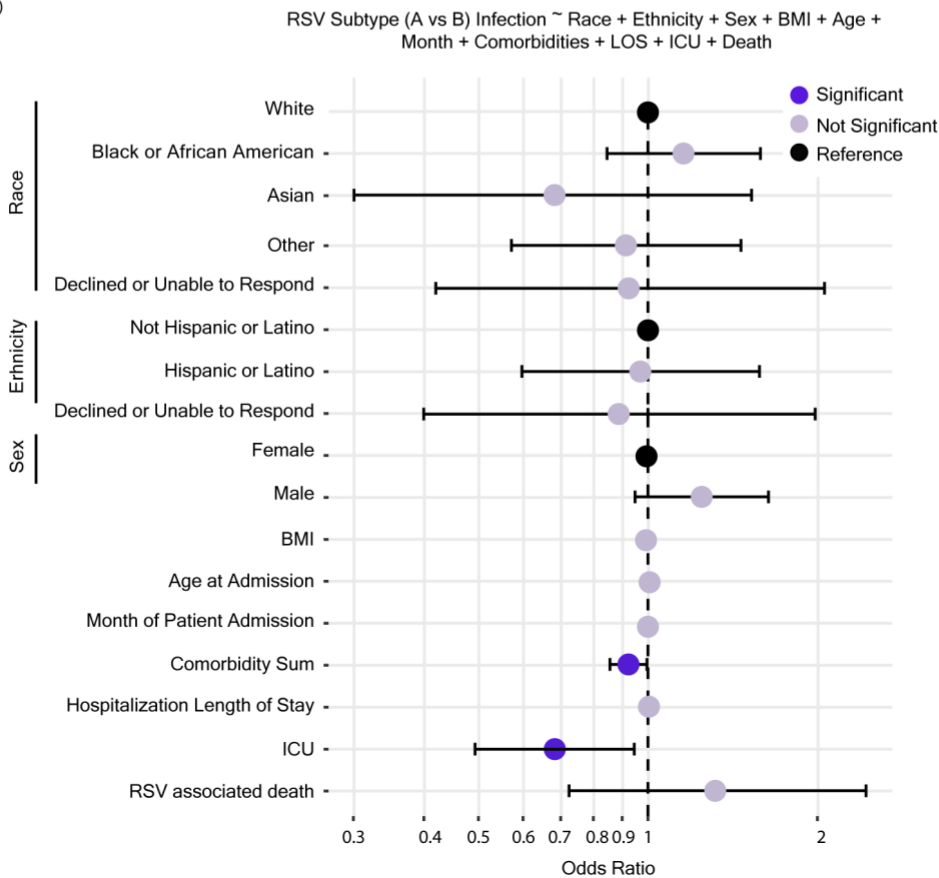

31 **Supplementary Figure 4 | Modeling Inpatient Outcome by RSV Subtype. a**, Parameters incorporated in the  
32 multivariable logistic regression to model RSV subtype infection among adult inpatients (n = 942). **b**, Parameters  
33 incorporated in the multivariable logistic regression to model RSV infection in adult inpatients, excluding the  
34 2020-2021 season and beyond. **c**, Odds ratio plot with 95% confidence intervals (CI) as calculated by a  
35 multivariable logistic regression model with RSV-A (reference) or RSV-B infection as the outcome variable in  
36 adult inpatients, excluding the 2020-2021 season and beyond. Significant features (p-value < 0.05) are  
37 highlighted in dark purple, insignificant features (p-value  $\geq$  0.05) are shown in light purple, and reference  
38 categories for categorical variables are shown in black.

39

40

41

42

43

44

45

46

47

48

49

50

a)

| ICU Admission                  |                 |                     |                  |
|--------------------------------|-----------------|---------------------|------------------|
| full model                     |                 |                     |                  |
| Characteristic                 | OR <sup>1</sup> | 95% CI <sup>1</sup> | p-value          |
| <b>Sex</b>                     |                 |                     |                  |
| Female                         | —               | —                   |                  |
| Male                           | 1.38            | 0.99, 1.93          | 0.059            |
| <b>Race</b>                    |                 |                     |                  |
| White                          | —               | —                   |                  |
| Asian                          | 1.06            | 0.37, 2.76          | >0.9             |
| Black or African American      | 1.10            | 0.74, 1.61          | 0.6              |
| Declined or Unable to Respond  | 0.76            | 0.27, 2.03          | 0.6              |
| Other                          | 1.17            | 0.66, 2.05          | 0.6              |
| <b>Ethnicity</b>               |                 |                     |                  |
| Not Hispanic or Latino         | —               | —                   |                  |
| Declined or Unable to Respond  | 0.71            | 0.24, 1.93          | 0.5              |
| Hispanic or Latino             | 1.04            | 0.57, 1.87          | 0.9              |
| <b>RSV Subtype</b>             |                 |                     |                  |
| RSV-A Infection                | —               | —                   |                  |
| RSV-B Infection                | 0.69            | 0.49, 0.95          | <b>0.025</b>     |
| BMI                            | 1.01            | 0.99, 1.03          | 0.3              |
| Age at Admission               | 1.01            | 1.00, 1.02          | 0.14             |
| Comorbidity Sum                | 0.96            | 0.87, 1.05          | 0.4              |
| RSV associated death           | 9.98            | 4.83, 22.1          | <b>&lt;0.001</b> |
| Month of Patient Admission     | 1.00            | 1.00, 1.00          | 0.3              |
| Hospitalization Length of Stay | 1.13            | 1.10, 1.16          | <b>&lt;0.001</b> |

<sup>1</sup> OR = Odds Ratio, CI = Confidence Interval

b)

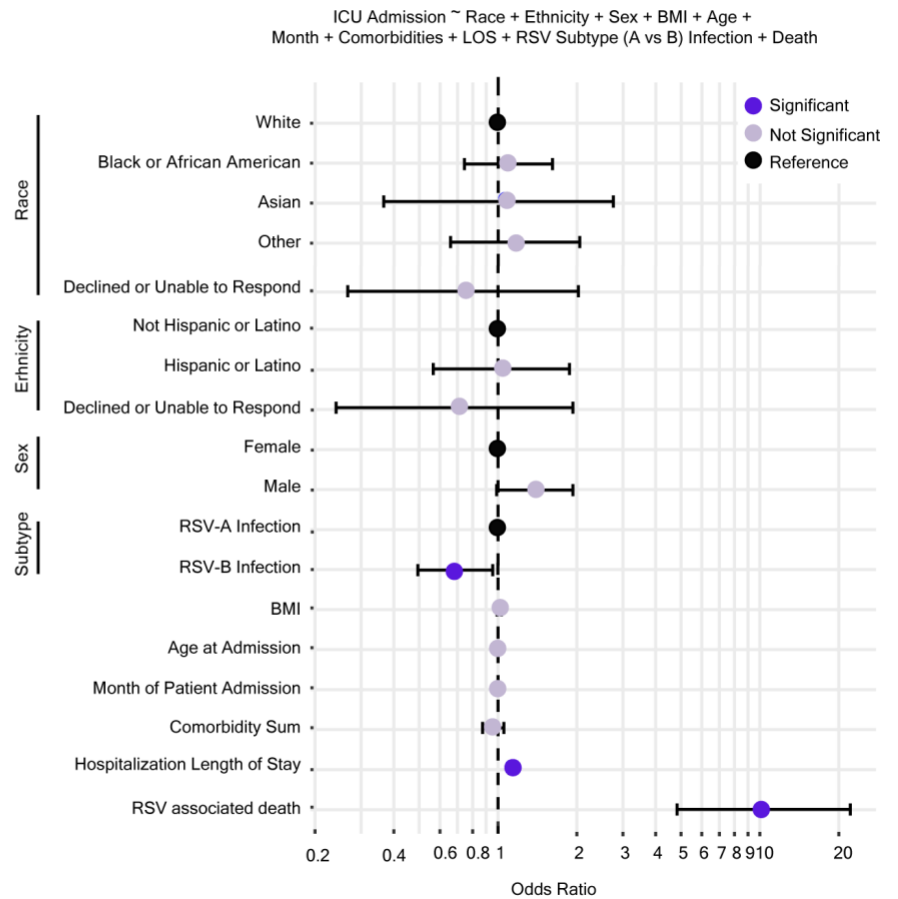

51

52

53

54

55

56

57

58

59

60

61

62

**Supplementary Figure 5 | Modeling Inpatient Outcome by ICU Admission.** **a**, Parameters incorporated in the multivariable logistic regression to model ICU admission among adult inpatients (n = 942). **b**, Odds ratio plot with 95% confidence intervals (CI) as calculated by a multivariable logistic regression model with ICU Admission as the outcome variable in adult inpatients. Significant features (p-value < 0.05) are highlighted in dark purple, insignificant features (p-value >= 0.05) are shown in light purple, and reference categories for categorical variables are shown in black.



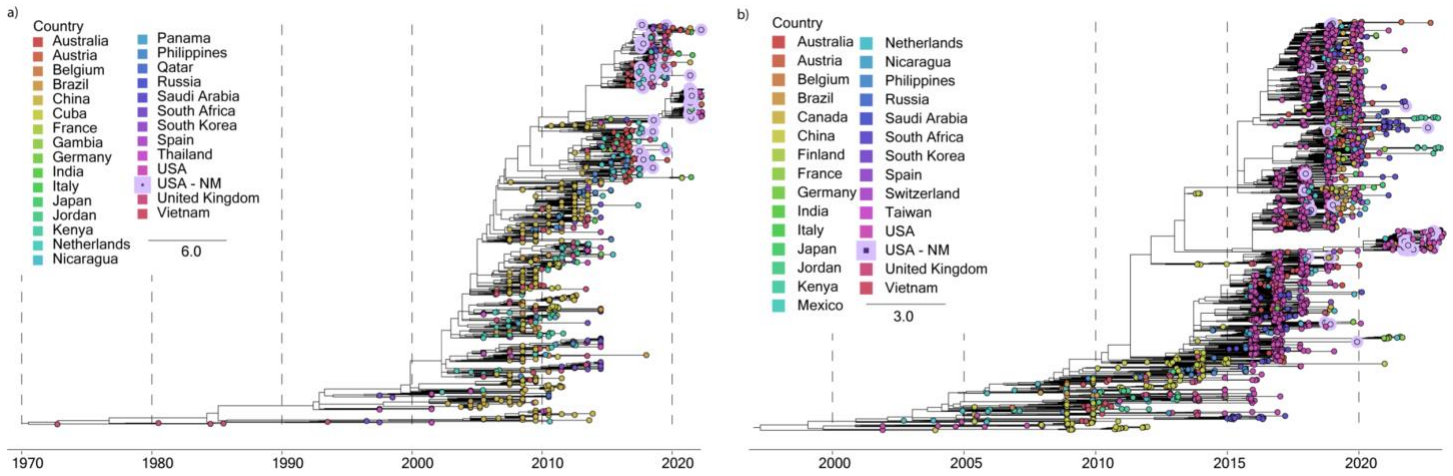

63  
64

65

66

67

68

69

70

71

**Supplementary Figure 6 | Temporal Analysis of RSV-B F and G.** **a**, Maximum likelihood (ML) phylogenetic temporal tree of unique circulating RSV-B complete G sequence collected from 1976 to 2023 as of October 2023 (n = 983). **b**, ML phylogenetic temporal tree of unique circulating RSV-B complete F sequences collected from 1997 to 2023 as of October 2023 (n= 2067). Branch tips are colored by country of origin, and scale units are substitutions/site/year.

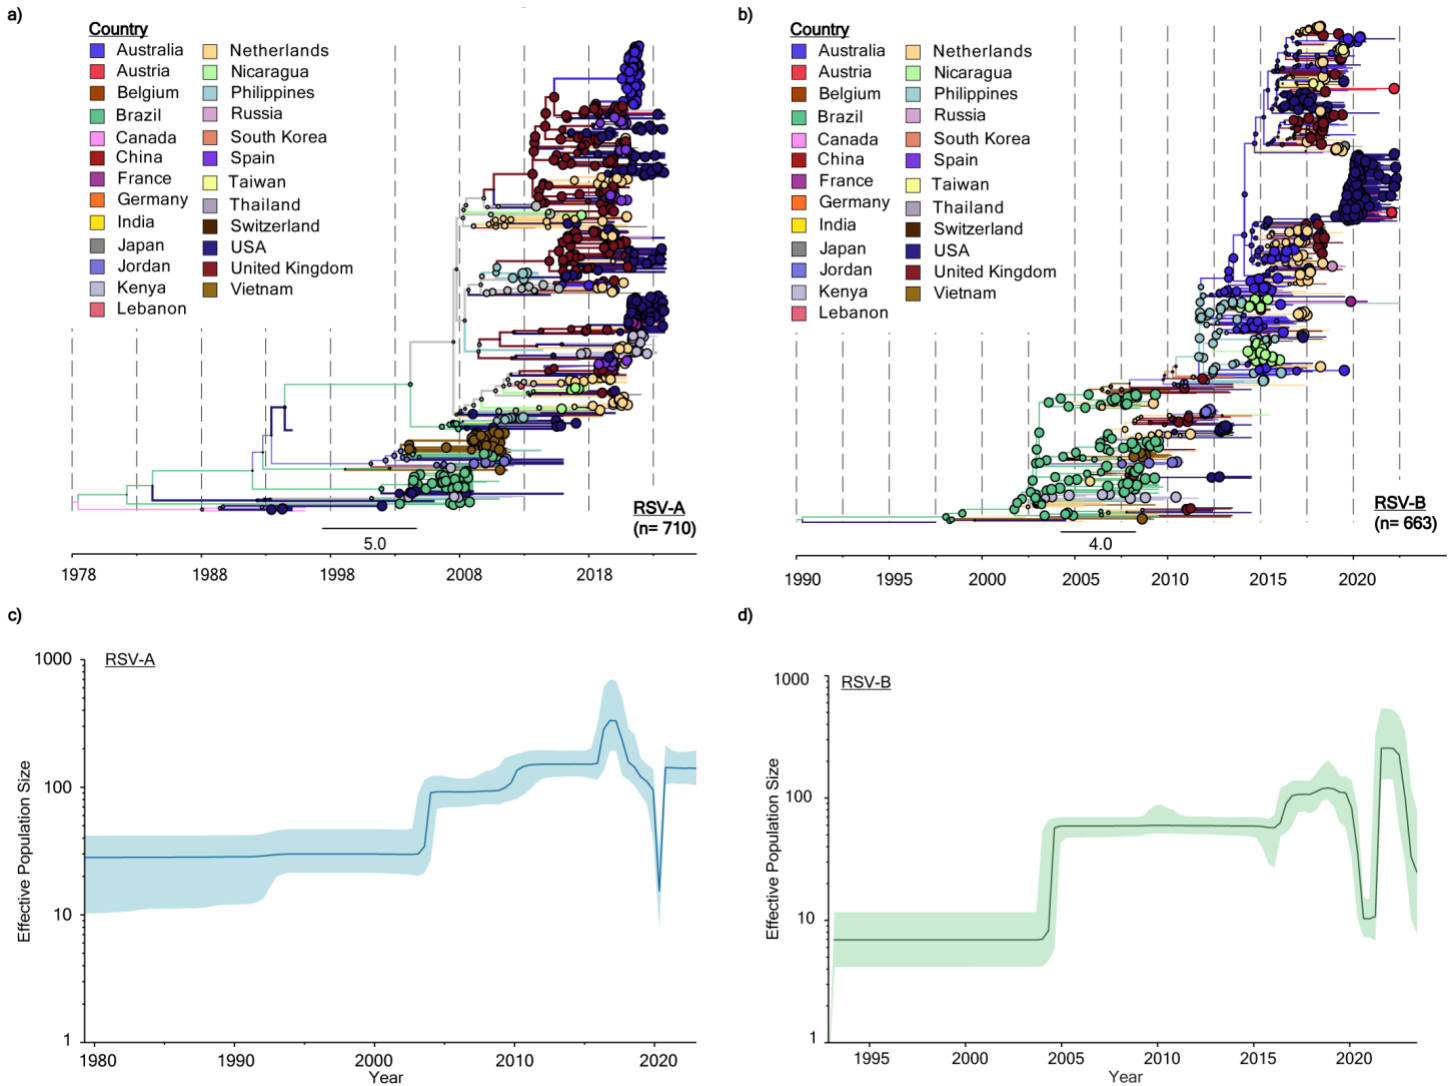

72 **Supplementary Figure 7 | Global Phylogenetic Analysis of RSV-A and RSV-B.** Bayesian phylogenetic  
 73 temporal tree of circulating **a**, RSV-A (excluding clade's A.2, A.1.1, & A.2.1.1) (n = 710) and **b**, all RSV-B (n =  
 74 663) complete genome sequences as of May 2023. Each phylogenetic tree corresponds to the maximum clade  
 75 credibility tree by depicting branch color by the most probable geographical location (*i.e.*, country) of their  
 76 descendent node. Node circle size corresponds to the probability of probable geographical location defining the  
 77 nod. **c**, RSV-A and **d**, RSV-B population dynamics using Bayesian skyline analyses to show effective population  
 78 size with respect to time. Shadings in each plot represent the 95% highest posterior density (HPD).  
 79  
 80

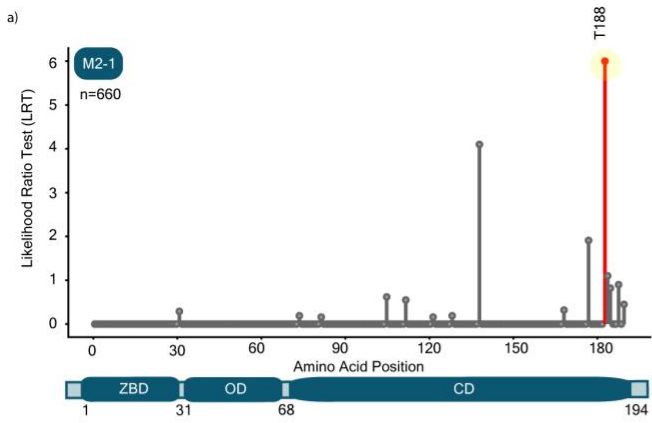

(+) Selection Mutations

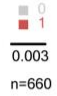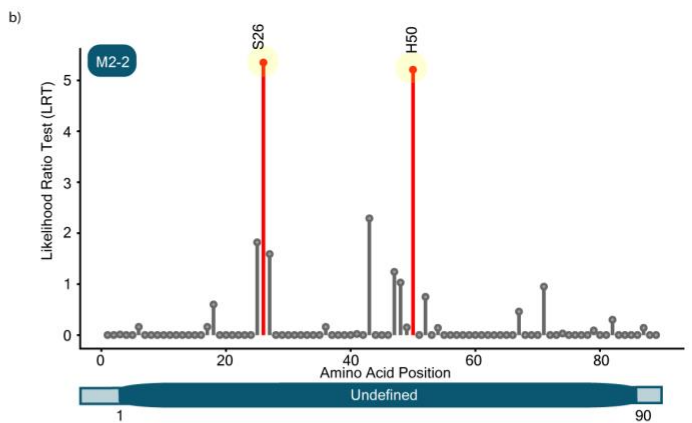

(+) Selection Mutations

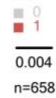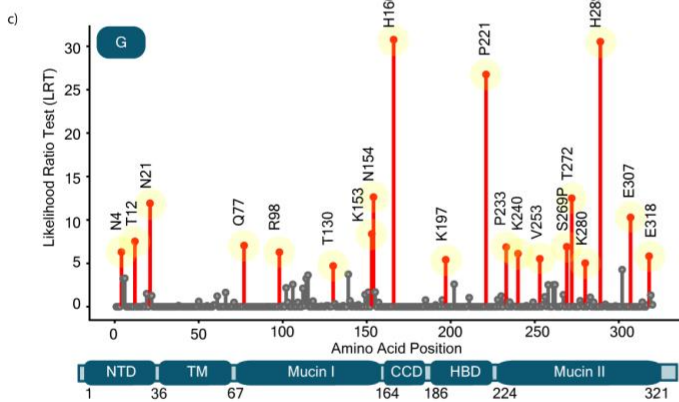

(+) Selection Mutations

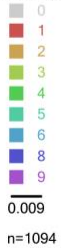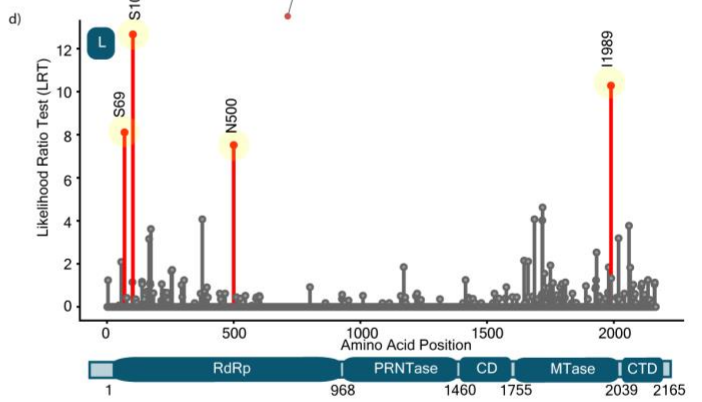

(+) Selection Mutations

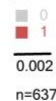

**Supplementary Figure 8 | Positive Selection of RSV-B ORFs.** Lollipop plots (top) for unique RSV-B open reading frames (ORFs) sequences with statistically significant sites of positive selection. Amino acid positions with statistically significant likelihood ratio test (LRT) ( $p$ -value  $< 0.05$ ) indicating episodic selection by a mixed effects model of evolution (MEME) are colored in red and annotated using a generated most recent common ancestor (MRCA). Nonsignificant LRT and posterior probability are in gray. Maximum likelihood (ML) genetic diversity trees (bottom) for ORFs depicted in lollipop plots to display the isolates that contain mutations at positive selection sites. Branch tips are colored by the number of mutations present at positively selected sites. The ORF sequences used are globally sampled from 1957 to 2023 for a, M2-1 ( $n = 660$ ), b, M2-2 ( $n = 658$ ), c, G ( $n = 1094$ ), and d, L ( $n = 637$ ).

91  
92  
93  
94  
95  
96  
97  
98  
99  
100  
101  
102  
103  
104  
105  
106  
107  
108  
109  
110  
111  
112  
113

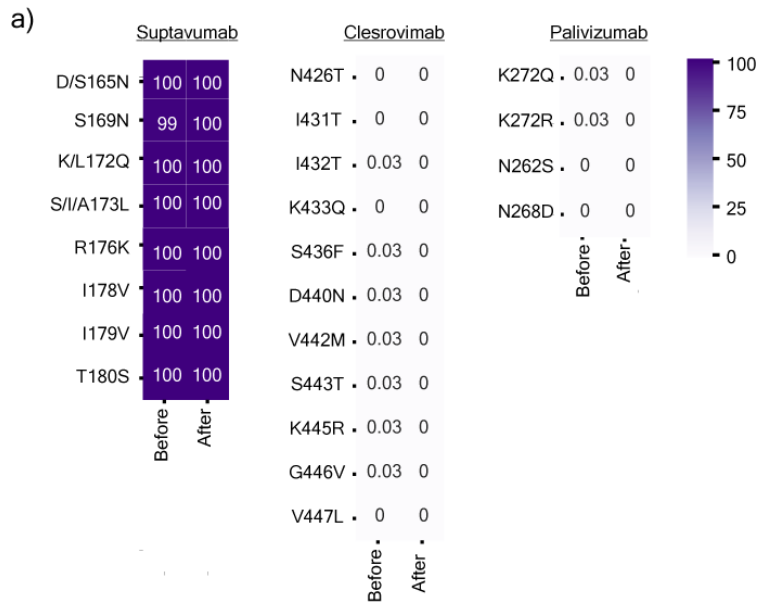

**Supplementary Figure 9 | Globally Circulating RSV-B Mutations in Fusion Protein on Mab Binding Site**  
 a, Heatmap displaying mutational frequencies at positions within the Suptavumab, Clesrovimab, and Palivizumab binding site before and after May 1, 2020, as compared to generated most-recent-common ancestor (MRCA).

114  
 115  
 116  
 117  
 118  
 119  
 120  
 121  
 122  
 123  
 124  
 125  
 126  
 127  
 128  
 129  
 130  
 131  
 132  
 133  
 134  
 135  
 136  
 137  
 138  
 139  
 140

| NCBI ID                           | Nextstrain clade | G clade | Accession Number |
|-----------------------------------|------------------|---------|------------------|
| RSV-A/human/USA/IL-NM-RSV012/2019 | A.D.1            | GA2.3.5 | PP352278         |
| RSV-A/human/USA/IL-NM-RSV013/2019 | A.D.1            | GA2.3.5 | PP352279         |
| RSV-A/human/USA/IL-NM-RSV016/2019 | A.D.1            | GA2.3.5 | PP352280         |
| RSV-A/human/USA/IL-NM-RSV026/2018 | A.D.1            | GA2.3.5 | PP352281         |
| RSV-A/human/USA/IL-NM-RSV044/2019 | A.D.2.3          | GA2.3.5 | PP352282         |
| RSV-A/human/USA/IL-NM-RSV045/2019 | A.D.1            | GA2.3.5 | PP352283         |
| RSV-A/human/USA/IL-NM-RSV046/2019 | A.D.2.2          | GA2.3.5 | PP352284         |
| RSV-A/human/USA/IL-NM-RSV066/2019 | A.D.1            | GA2.3.5 | PP352285         |
| RSV-A/human/USA/IL-NM-RSV069/2019 | A.D.3            | GA2.3.5 | PP352286         |
| RSV-A/human/USA/IL-NM-RSV078/2018 | A.D.4            | GA2.3.5 | PP352287         |
| RSV-A/human/USA/IL-NM-RSV088/2018 | A.D.3            | GA2.3.5 | PP352288         |
| RSV-A/human/USA/IL-NM-RSV091/2018 | A.D.1            | GA2.3.5 | PP352289         |
| RSV-A/human/USA/IL-NM-RSV094/2019 | A.D.1            | GA2.3.5 | PP352290         |
| RSV-A/human/USA/IL-NM-RSV095/2019 | A.D.2.2          | GA2.3.5 | PP352291         |
| RSV-A/human/USA/IL-NM-RSV103/2019 | A.D.3            | GA2.3.5 | PP352292         |
| RSV-A/human/USA/IL-NM-RSV108/2018 | A.D.             | GA2.3.5 | PP352293         |
| RSV-A/human/USA/IL-NM-RSV110/2019 | A.D.1            | GA2.3.5 | PP352294         |
| RSV-A/human/USA/IL-NM-RSV124/2019 | A.D.1            | GA2.3.5 | PP352295         |
| RSV-A/human/USA/IL-NM-RSV128/2019 | A.D.4            | GA2.3.5 | PP352296         |
| RSV-A/human/USA/IL-NM-RSV130/2019 | A.D.1            | GA2.3.5 | PP352297         |
| RSV-A/human/USA/IL-NM-RSV148/2019 | A.D.2.3          | GA2.3.5 | PP352298         |
| RSV-A/human/USA/IL-NM-RSV159/2019 | A.D.2.3          | GA2.3.5 | PP352299         |
| RSV-A/human/USA/IL-NM-RSV162/2019 | A.D.4            | GA2.3.5 | PP352300         |
| RSV-A/human/USA/IL-NM-RSV175/2018 | A.D.1            | GA2.3.5 | PP352301         |
| RSV-A/human/USA/IL-NM-RSV180/2018 | A.D.4            | GA2.3.5 | PP352302         |
| RSV-A/human/USA/IL-NM-RSV181/2018 | A.D.1            | GA2.3.5 | PP352303         |
| RSV-A/human/USA/IL-NM-RSV182/2018 | A.D.2.2          | GA2.3.5 | PP352304         |
| RSV-A/human/USA/IL-NM-RSV187/2018 | A.D.1            | GA2.3.5 | PP352305         |
| RSV-A/human/USA/IL-NM-RSV188/2018 | A.D.1            | GA2.3.5 | PP352306         |
| RSV-A/human/USA/IL-NM-RSV194/2019 | A.D.3            | GA2.3.5 | PP352307         |
| RSV-A/human/USA/IL-NM-RSV199/2019 | A.D.1            | GA2.3.5 | PP352308         |
| RSV-A/human/USA/IL-NM-RSV200/2019 | A.D.             | GA2.3.5 | PP352309         |
| RSV-A/human/USA/IL-NM-RSV207/2020 | A.D.1            | GA2.3.5 | PP352310         |
| RSV-A/human/USA/IL-NM-RSV209/2020 | A.D.1            | GA2.3.5 | PP352311         |
| RSV-A/human/USA/IL-NM-RSV210/2020 | A.D.1            | GA2.3.5 | PP352312         |
| RSV-A/human/USA/IL-NM-RSV215/2020 | A.D.3            | GA2.3.5 | PP352313         |
| RSV-A/human/USA/IL-NM-RSV216/2020 | A.D.3            | GA2.3.5 | PP352314         |
| RSV-A/human/USA/IL-NM-RSV218/2019 | A.D.1            | GA2.3.5 | PP352315         |
| RSV-A/human/USA/IL-NM-RSV224/2020 | A.D.1            | GA2.3.5 | PP352316         |
| RSV-A/human/USA/IL-NM-RSV228/2020 | A.D.2            | GA2.3.5 | PP352317         |
| RSV-A/human/USA/IL-NM-RSV231/2020 | A.D.5            | GA2.3.5 | PP352318         |
| RSV-A/human/USA/IL-NM-RSV241/2019 | A.D.1            | GA2.3.5 | PP352319         |
| RSV-A/human/USA/IL-NM-RSV294/2018 | A.D.5            | GA2.3.5 | PP352320         |
| RSV-A/human/USA/IL-NM-RSV300/2019 | A.D.2.2          | GA2.3.5 | PP352321         |
| RSV-A/human/USA/IL-NM-RSV302/2019 | A.D.1            | GA2.3.5 | PP352322         |
| RSV-A/human/USA/IL-NM-RSV336/2021 | A.D.3            | GA2.3.5 | PP352323         |
| RSV-A/human/USA/IL-NM-RSV378/2021 | A.D.1            | GA2.3.5 | PP352324         |
| RSV-A/human/USA/IL-NM-RSV403/2022 | A.D.1            | GA2.3.5 | PP352325         |
| RSV-A/human/USA/IL-NM-RSV404/2022 | A.D.1            | GA2.3.5 | PP352326         |
| RSV-A/human/USA/IL-NM-RSV408/2022 | A.D.1            | GA2.3.5 | PP352327         |

|                                   |         |         |          |
|-----------------------------------|---------|---------|----------|
| RSV-A/human/USA/IL-NM-RSV409/2022 | A.D.5.2 | GA2.3.5 | PP352328 |
| RSV-A/human/USA/IL-NM-RSV410/2022 | A.D.5.1 | GA2.3.5 | PP352329 |
| RSV-A/human/USA/IL-NM-RSV411/2022 | A.D.1   | GA2.3.5 | PP352330 |
| RSV-A/human/USA/IL-NM-RSV414/2022 | A.D.5.2 | GA2.3.5 | PP352331 |
| RSV-A/human/USA/IL-NM-RSV415/2022 | A.D.5.2 | GA2.3.5 | PP352332 |
| RSV-A/human/USA/IL-NM-RSV416/2022 | A.D.1   | GA2.3.5 | PP352333 |
| RSV-A/human/USA/IL-NM-RSV417/2022 | A.D.3   | GA2.3.5 | PP352334 |
| RSV-A/human/USA/IL-NM-RSV418/2022 | A.D.5.2 | GA2.3.5 | PP352335 |
| RSV-A/human/USA/IL-NM-RSV421/2022 | A.D.5.2 | GA2.3.5 | PP352336 |
| RSV-A/human/USA/IL-NM-RSV422/2022 | A.D.3   | GA2.3.5 | PP352337 |
| RSV-A/human/USA/IL-NM-RSV424/2022 | A.D.1   | GA2.3.5 | PP352338 |
| RSV-A/human/USA/IL-NM-RSV427/2022 | A.D.5.2 | GA2.3.5 | PP352339 |
| RSV-A/human/USA/IL-NM-RSV428/2022 | A.D.1   | GA2.3.5 | PP352340 |
| RSV-A/human/USA/IL-NM-RSV429/2022 | A.D.1   | GA2.3.5 | PP352341 |
| RSV-A/human/USA/IL-NM-RSV430/2022 | A.D.1   | GA2.3.5 | PP352342 |
| RSV-A/human/USA/IL-NM-RSV431/2022 | A.D.5.2 | GA2.3.5 | PP352343 |
| RSV-A/human/USA/IL-NM-RSV434/2022 | A.D.1   | GA2.3.5 | PP352344 |
| RSV-A/human/USA/IL-NM-RSV435/2022 | A.D.1   | GA2.3.5 | PP352345 |
| RSV-A/human/USA/IL-NM-RSV441/2022 | A.D.3   | GA2.3.5 | PP352346 |
| RSV-A/human/USA/IL-NM-RSV443/2022 | A.D.1   | GA2.3.5 | PP352347 |
| RSV-A/human/USA/IL-NM-RSV447/2022 | A.D.5.2 | GA2.3.5 | PP352348 |
| RSV-A/human/USA/IL-NM-RSV448/2022 | A.D.1   | GA2.3.5 | PP352349 |
| RSV-A/human/USA/IL-NM-RSV451/2022 | A.D.1   | GA2.3.5 | PP352350 |
| RSV-A/human/USA/IL-NM-RSV452/2022 | A.D.1   | GA2.3.5 | PP352351 |
| RSV-A/human/USA/IL-NM-RSV454/2022 | A.D.1   | GA2.3.5 | PP352352 |
| RSV-A/human/USA/IL-NM-RSV456/2022 | A.D.3   | GA2.3.5 | PP352353 |
| RSV-A/human/USA/IL-NM-RSV457/2022 | A.D.1   | GA2.3.5 | PP352354 |
| RSV-A/human/USA/IL-NM-RSV464/2022 | A.D.3   | GA2.3.5 | PP352355 |
| RSV-A/human/USA/IL-NM-RSV465/2022 | A.D.1   | GA2.3.5 | PP352356 |
| RSV-A/human/USA/IL-NM-RSV466/2022 | A.D.1   | GA2.3.5 | PP352357 |
| RSV-A/human/USA/IL-NM-RSV468/2022 | A.D.5.1 | GA2.3.5 | PP352358 |
| RSV-A/human/USA/IL-NM-RSV471/2022 | A.D.5.2 | GA2.3.5 | PP352359 |
| RSV-A/human/USA/IL-NM-RSV475/2022 | A.D.5.2 | GA2.3.5 | PP352360 |
| RSV-A/human/USA/IL-NM-RSV480/2022 | A.D.1   | GA2.3.5 | PP352361 |
| RSV-A/human/USA/IL-NM-RSV483/2022 | A.D.1   | GA2.3.5 | PP352362 |
| RSV-A/human/USA/IL-NM-RSV484/2022 | A.D.3   | GA2.3.5 | PP352363 |
| RSV-A/human/USA/IL-NM-RSV485/2022 | A.D.3   | GA2.3.5 | PP352364 |
| RSV-A/human/USA/IL-NM-RSV486/2022 | A.D.5.2 | GA2.3.5 | PP352365 |
| RSV-A/human/USA/IL-NM-RSV489/2022 | A.D.5.2 | GA2.3.5 | PP352366 |
| RSV-A/human/USA/IL-NM-RSV490/2022 | A.D.3.1 | GA2.3.5 | PP352367 |
| RSV-A/human/USA/IL-NM-RSV494/2022 | A.D.1   | GA2.3.5 | PP352368 |
| RSV-A/human/USA/IL-NM-RSV495/2022 | A.D.1   | GA2.3.5 | PP352369 |
| RSV-A/human/USA/IL-NM-RSV501/2022 | A.D.5.2 | GA2.3.5 | PP352370 |
| RSV-A/human/USA/IL-NM-RSV504/2022 | A.D.3   | GA2.3.5 | PP352371 |
| RSV-A/human/USA/IL-NM-RSV505/2022 | A.D.5.2 | GA2.3.5 | PP352372 |
| RSV-A/human/USA/IL-NM-RSV508/2022 | A.D.5.2 | GA2.3.5 | PP352373 |
| RSV-A/human/USA/IL-NM-RSV511/2022 | A.D.5.2 | GA2.3.5 | PP352374 |
| RSV-A/human/USA/IL-NM-RSV513/2022 | A.D.1   | GA2.3.5 | PP352375 |
| RSV-A/human/USA/IL-NM-RSV515/2022 | A.D.1   | GA2.3.5 | PP352376 |
| RSV-A/human/USA/IL-NM-RSV518/2022 | A.D.1   | GA2.3.5 | PP352377 |
| RSV-A/human/USA/IL-NM-RSV524/2022 | A.D.3   | GA2.3.5 | PP352378 |



|                                   |           |          |          |
|-----------------------------------|-----------|----------|----------|
| RSV-A/human/USA/IL-NM-RSV527/2022 | A.D.3     | GA2.3.5  | PP352379 |
| RSV-A/human/USA/IL-NM-RSV528/2022 | A.D.5.2   | GA2.3.5  | PP352380 |
| RSV-A/human/USA/IL-NM-RSV529/2022 | A.D.3     | GA2.3.5  | PP352381 |
| RSV-A/human/USA/IL-NM-RSV538/2022 | A.D.3     | GA2.3.5  | PP352382 |
| RSV-A/human/USA/IL-NM-RSV541/2022 | A.D.5.2   | GA2.3.5  | PP352383 |
| RSV-A/human/USA/IL-NM-RSV542/2022 | A.D.1     | GA2.3.5  | PP352384 |
| RSV-A/human/USA/IL-NM-RSV545/2022 | A.D.3     | GA2.3.5  | PP352385 |
| RSV-A/human/USA/IL-NM-RSV547/2022 | A.D.3     | GA2.3.5  | PP352386 |
| RSV-A/human/USA/IL-NM-RSV548/2022 | A.D.5.2   | GA2.3.5  | PP352387 |
| RSV-B/human/USA/IL-NM-RSV015/2018 | B.D.5.2.1 | GB5.0.5a | PP352388 |
| RSV-B/human/USA/IL-NM-RSV021/2019 | B.D.5.2.1 | GB5.0.5a | PP352389 |
| RSV-B/human/USA/IL-NM-RSV024/2018 | B.D.5.2.1 | GB5.0.5a | PP352390 |
| RSV-B/human/USA/IL-NM-RSV039/2018 | B.D.5.2.1 | GB5.0.5a | PP352391 |
| RSV-B/human/USA/IL-NM-RSV053/2018 | B.D.5.2   | GB5.0.5a | PP352392 |
| RSV-B/human/USA/IL-NM-RSV055/2019 | B.D.5.2.1 | GB5.0.5a | PP352393 |
| RSV-B/human/USA/IL-NM-RSV067/2019 | B.D.5.2   | GB5.0.5a | PP352394 |
| RSV-B/human/USA/IL-NM-RSV081/2019 | B.D.5.2   | GB5.0.5a | PP352395 |
| RSV-B/human/USA/IL-NM-RSV085/2018 | B.D.5.2.1 | GB5.0.5a | PP352396 |
| RSV-B/human/USA/IL-NM-RSV106/2017 | B.D.5.2   | GB5.0.5a | PP352397 |
| RSV-B/human/USA/IL-NM-RSV109/2018 | B.D.5.2.1 | GB5.0.5a | PP352398 |
| RSV-B/human/USA/IL-NM-RSV111/2017 | B.D.5.2.1 | GB5.0.5a | PP352399 |
| RSV-B/human/USA/IL-NM-RSV112/2018 | B.D.5.2.1 | GB5.0.5a | PP352400 |
| RSV-B/human/USA/IL-NM-RSV113/2018 | B.D.5.2.1 | GB5.0.5a | PP352401 |
| RSV-B/human/USA/IL-NM-RSV115/2017 | B.D.5.2.1 | GB5.0.5a | PP352402 |
| RSV-B/human/USA/IL-NM-RSV127/2018 | B.D.5.2.1 | GB5.0.5a | PP352403 |
| RSV-B/human/USA/IL-NM-RSV137/2018 | B.D.5.2.1 | GB5.0.5a | PP352404 |
| RSV-B/human/USA/IL-NM-RSV140/2018 | B.D.5.2.1 | GB5.0.5a | PP352405 |
| RSV-B/human/USA/IL-NM-RSV141/2018 | B.D.5.2   | GB5.0.5a | PP352406 |
| RSV-B/human/USA/IL-NM-RSV142/2019 | B.D.5.2.1 | GB5.0.5a | PP352407 |
| RSV-B/human/USA/IL-NM-RSV143/2018 | B.D.5.2.1 | GB5.0.5a | PP352408 |
| RSV-B/human/USA/IL-NM-RSV145/2018 | B.D.5.2.1 | GB5.0.5a | PP352409 |
| RSV-B/human/USA/IL-NM-RSV149/2019 | B.D.5.2.1 | GB5.0.5a | PP352410 |
| RSV-B/human/USA/IL-NM-RSV152/2019 | B.D.5.2.1 | GB5.0.5a | PP352411 |
| RSV-B/human/USA/IL-NM-RSV163/2018 | B.D.5.2   | GB5.0.5a | PP352412 |
| RSV-B/human/USA/IL-NM-RSV164/2019 | B.D.5.2.1 | GB5.0.5a | PP352413 |
| RSV-B/human/USA/IL-NM-RSV168/2018 | B.D.5.2.1 | GB5.0.5a | PP352414 |
| RSV-B/human/USA/IL-NM-RSV171/2018 | B.D.5.2.1 | GB5.0.5a | PP352415 |
| RSV-B/human/USA/IL-NM-RSV177/2018 | B.D.5.2.1 | GB5.0.5a | PP352416 |
| RSV-B/human/USA/IL-NM-RSV185/2018 | B.D.5.2   | GB5.0.5a | PP352417 |
| RSV-B/human/USA/IL-NM-RSV190/2018 | B.D.5.2.1 | GB5.0.5a | PP352418 |
| RSV-B/human/USA/IL-NM-RSV203/2020 | B.D.5.2.1 | GB5.0.5a | PP352419 |
| RSV-B/human/USA/IL-NM-RSV208/2020 | B.D.5.2.1 | GB5.0.5a | PP352420 |
| RSV-B/human/USA/IL-NM-RSV214/2019 | B.D.5.2.1 | GB5.0.5a | PP352421 |
| RSV-B/human/USA/IL-NM-RSV222/2020 | B.D.5.2   | GB5.0.5a | PP352422 |
| RSV-B/human/USA/IL-NM-RSV235/2020 | B.D.5.2.1 | GB5.0.5a | PP352423 |
| RSV-B/human/USA/IL-NM-RSV246/2019 | B.D.5.2.1 | GB5.0.5a | PP352424 |
| RSV-B/human/USA/IL-NM-RSV247/2018 | B.D.5.2.1 | GB5.0.5a | PP352425 |
| RSV-B/human/USA/IL-NM-RSV250/2020 | B.D.5.2.1 | GB5.0.5a | PP352426 |
| RSV-B/human/USA/IL-NM-RSV252/2020 | B.D.5.2.1 | GB5.0.5a | PP352427 |



|                                   |             |          |          |
|-----------------------------------|-------------|----------|----------|
| RSV-B/human/USA/IL-NM-RSV253/2019 | B.D.5.2.1   | GB5.0.5a | PP352428 |
| RSV-B/human/USA/IL-NM-RSV255/2019 | B.D.5.2.1   | GB5.0.5a | PP352429 |
| RSV-B/human/USA/IL-NM-RSV256/2020 | B.D.5.2.1   | GB5.0.5a | PP352430 |
| RSV-B/human/USA/IL-NM-RSV260/2018 | B.D.5.2.1   | GB5.0.5a | PP352431 |
| RSV-B/human/USA/IL-NM-RSV267/2019 | B.D.5.2.1   | GB5.0.5a | PP352432 |
| RSV-B/human/USA/IL-NM-RSV272/2019 | B.D.5.2.1   | GB5.0.5a | PP352433 |
| RSV-B/human/USA/IL-NM-RSV280/2018 | B.D.5.2.1   | GB5.0.5a | PP352434 |
| RSV-B/human/USA/IL-NM-RSV292/2018 | B.D.5.2.1   | GB5.0.5a | PP352435 |
| RSV-B/human/USA/IL-NM-RSV296/2018 | B.D.5.2.1   | GB5.0.5a | PP352436 |
| RSV-B/human/USA/IL-NM-RSV298/2019 | B.D.5.2.1   | GB5.0.5a | PP352437 |
| RSV-B/human/USA/IL-NM-RSV299/2018 | B.D.5.2     | GB5.0.5a | PP352438 |
| RSV-B/human/USA/IL-NM-RSV303/2018 | B.D.5.2.1   | GB5.0.5a | PP352439 |
| RSV-B/human/USA/IL-NM-RSV310/2018 | B.D.5.2.1   | GB5.0.5a | PP352440 |
| RSV-B/human/USA/IL-NM-RSV311/2019 | B.D.5.2.1   | GB5.0.5a | PP352441 |
| RSV-B/human/USA/IL-NM-RSV313/2021 | B.D.5.2.1.1 | GB5.0.5a | PP352442 |
| RSV-B/human/USA/IL-NM-RSV314/2021 | B.D.5.2.1.1 | GB5.0.5a | PP352443 |
| RSV-B/human/USA/IL-NM-RSV316/2021 | B.D.5.2.1.1 | GB5.0.5a | PP352444 |
| RSV-B/human/USA/IL-NM-RSV317/2021 | B.D.5.2.1.1 | GB5.0.5a | PP352445 |
| RSV-B/human/USA/IL-NM-RSV320/2021 | B.D.5.2.1.1 | GB5.0.5a | PP352446 |
| RSV-B/human/USA/IL-NM-RSV321/2021 | B.D.5.2.1.1 | GB5.0.5a | PP352447 |
| RSV-B/human/USA/IL-NM-RSV323/2021 | B.D.5.2.1.1 | GB5.0.5a | PP352448 |
| RSV-B/human/USA/IL-NM-RSV324/2021 | B.D.5.2.1.1 | GB5.0.5a | PP352449 |
| RSV-B/human/USA/IL-NM-RSV326/2021 | B.D.5.2.1.1 | GB5.0.5a | PP352450 |
| RSV-B/human/USA/IL-NM-RSV327/2021 | B.D.5.2.1.1 | GB5.0.5a | PP352451 |
| RSV-B/human/USA/IL-NM-RSV329/2021 | B.D.5.2.1.1 | GB5.0.5a | PP352452 |
| RSV-B/human/USA/IL-NM-RSV333/2021 | B.D.5.2.1.1 | GB5.0.5a | PP352453 |
| RSV-B/human/USA/IL-NM-RSV335/2021 | B.D.5.2.1.1 | GB5.0.5a | PP352454 |
| RSV-B/human/USA/IL-NM-RSV337/2021 | B.D.5.2.1.1 | GB5.0.5a | PP352455 |
| RSV-B/human/USA/IL-NM-RSV340/2021 | B.D.5.2.1   | GB5.0.5a | PP352456 |
| RSV-B/human/USA/IL-NM-RSV341/2021 | B.D.5.2.1.1 | GB5.0.5a | PP352457 |
| RSV-B/human/USA/IL-NM-RSV342/2021 | B.D.5.2.1.1 | GB5.0.5a | PP352458 |
| RSV-B/human/USA/IL-NM-RSV345/2021 | B.D.5.2.1.1 | GB5.0.5a | PP352459 |
| RSV-B/human/USA/IL-NM-RSV347/2021 | B.D.5.2.1.1 | GB5.0.5a | PP352460 |
| RSV-B/human/USA/IL-NM-RSV348/2022 | B.D.5.2.1.1 | GB5.0.5a | PP352461 |
| RSV-B/human/USA/IL-NM-RSV351/2021 | B.D.5.2.1.1 | GB5.0.5a | PP352462 |
| RSV-B/human/USA/IL-NM-RSV353/2021 | B.D.5.2.1.1 | GB5.0.5a | PP352463 |
| RSV-B/human/USA/IL-NM-RSV355/2021 | B.D.5.2.1.1 | GB5.0.5a | PP352464 |
| RSV-B/human/USA/IL-NM-RSV356/2021 | B.D.5.2.1.1 | GB5.0.5a | PP352465 |
| RSV-B/human/USA/IL-NM-RSV357/2021 | B.D.5.2.1.1 | GB5.0.5a | PP352466 |
| RSV-B/human/USA/IL-NM-RSV358/2021 | B.D.5.2.1.1 | GB5.0.5a | PP352467 |
| RSV-B/human/USA/IL-NM-RSV360/2021 | B.D.E.1     | GB5.0.5a | PP352468 |
| RSV-B/human/USA/IL-NM-RSV361/2021 | B.D.5.2.1.1 | GB5.0.5a | PP352469 |
| RSV-B/human/USA/IL-NM-RSV366/2021 | B.D.5.2.1.1 | GB5.0.5a | PP352470 |
| RSV-B/human/USA/IL-NM-RSV368/2021 | B.D.5.2.1.1 | GB5.0.5a | PP352471 |
| RSV-B/human/USA/IL-NM-RSV370/2021 | B.D.5.2.1.1 | GB5.0.5a | PP352472 |
| RSV-B/human/USA/IL-NM-RSV373/2021 | B.D.5.2.1.1 | GB5.0.5a | PP352473 |
| RSV-B/human/USA/IL-NM-RSV374/2021 | B.D.5.2.1.1 | GB5.0.5a | PP352474 |
| RSV-B/human/USA/IL-NM-RSV375/2021 | B.D.5.2.1.1 | GB5.0.5a | PP352475 |
| RSV-B/human/USA/IL-NM-RSV379/2021 | B.D.5.2.1.1 | GB5.0.5a | PP352476 |

|                                   |             |          |          |
|-----------------------------------|-------------|----------|----------|
| RSV-B/human/USA/IL-NM-RSV381/2021 | B.D.5.2.1.1 | GB5.0.5a | PP352477 |
| RSV-B/human/USA/IL-NM-RSV382/2022 | B.D.5.2.1.1 | GB5.0.5a | PP352478 |
| RSV-B/human/USA/IL-NM-RSV383/2021 | B.D.5.2.1.1 | GB5.0.5a | PP352479 |
| RSV-B/human/USA/IL-NM-RSV385/2021 | B.D.5.2.1.1 | GB5.0.5a | PP352480 |
| RSV-B/human/USA/IL-NM-RSV387/2021 | B.D.5.2.1.1 | GB5.0.5a | PP352481 |
| RSV-B/human/USA/IL-NM-RSV389/2021 | B.D.5.2.1.1 | GB5.0.5a | PP352482 |
| RSV-B/human/USA/IL-NM-RSV394/2021 | B.D.5.2.1.1 | GB5.0.5a | PP352483 |
| RSV-B/human/USA/IL-NM-RSV400/2022 | B.D.5.2.1.1 | GB5.0.5a | PP352484 |
| RSV-B/human/USA/IL-NM-RSV401/2022 | B.D.5.2.1.1 | GB5.0.5a | PP352485 |
| RSV-B/human/USA/IL-NM-RSV446/2022 | B.D.5.2.1.4 | GB5.0.5a | PP352488 |
| RSV-B/human/USA/IL-NM-RSV458/2022 | B.D.5.2.1.1 | GB5.0.5a | PP352494 |
| RSV-B/human/USA/IL-NM-RSV463/2022 | B.D.5.2.1.1 | GB5.0.5a | PP352489 |
| RSV-B/human/USA/IL-NM-RSV476/2022 | B.D.5.2.1.1 | GB5.0.5a | PP352495 |
| RSV-B/human/USA/IL-NM-RSV509/2022 | B.D.5.2.1.1 | GB5.0.5a | PP352487 |
| RSV-B/human/USA/IL-NM-RSV520/2022 | B.D.5.2.1.1 | GB5.0.5a | PP352492 |
| RSV-B/human/USA/IL-NM-RSV525/2022 | B.D.5.2.1.1 | GB5.0.5a | PP352490 |
| RSV-B/human/USA/IL-NM-RSV536/2022 | B.D.5.2.1.1 | GB5.0.5a | PP352491 |
| RSV-B/human/USA/IL-NM-RSV537/2022 | B.D.5.2.1.1 | GB5.0.5a | PP352493 |
| RSV-B/human/USA/IL-NM-RSV551/2022 | B.D.5.2.1.1 | GB5.0.5a | PP352486 |

141

142

**Supplementary Table 1 | NCBI Accession ID numbers for deposited RSV whole genome sequences.**

143

144

145

146

147

148

149

150

151

152

153

154

155

156

157

158

159

160

161

162

163

| Step                        | Primer Sequence          |
|-----------------------------|--------------------------|
| RT                          | ACGCGAAAAAATGCGTAC       |
| RT                          | AAYAAAGGAGCATTCAAATA     |
| RT                          | AAGGKGAACCWATAATAAATT    |
| RT                          | TATACTATGTMAACAAGCTG     |
| RT                          | TATATTATGTAAATAAGCAAG    |
| RT                          | GACCATWGAAGCYATATCA      |
| PCR - Forward (pair 1)      | ACGCGAAAAAATGCGTACWAC    |
| PCR - Forward (pair 2)      | GCCACARAGTCAATTYATAGTAG  |
| PCR - Forward (pair 3A & B) | TGATGCATCAATATCTCAAGTC   |
| PCR - Forward (pair 4)      | GAGATATGCARTTYATGAGYA    |
| PCR - Reverse (pair 1)      | TTTGATTGMAAAWCGTGTAGCTG  |
| PCR - Reverse (pair 2)      | TGTRACTGGTGTGYTTYTGG     |
| PCR - Reverse (pair 3A)     | AGGACTTTCTTTATACTAGCTG   |
| PCR - Reverse (pair 3B)     | AGGACTTTTTTGTACTGGCTG    |
| PCR - Reverse (pair 4)      | TGRATTTAACTTATTCTTCCTAGA |

164

165

**Supplementary Table 2 | Primers for RT-PCR Used in the RSV Sequencing Pipeline.**

166
